1 **Effect of irradiation on the survival and susceptibility of female *Anopheles arabiensis* to**  
2 **natural isolates of *Plasmodium falciparum***

3

4 Edwige Guissou<sup>1,2,3,4\*</sup>, Serge Poda<sup>1,2,3</sup>, François de Sales Domombabele Hien<sup>1,3</sup>, Serge  
5 Rakiswende Yerbanga<sup>1,3</sup>, Dari Frédéric Yannick Da<sup>1,3</sup>, Anna Cohuet<sup>2,3</sup>, Florence Fournet<sup>2,3</sup>,  
6 Olivier Roux<sup>2,3</sup>, Hamidou Maiga<sup>1</sup>, Abdoulaye Diabaté<sup>1,3</sup>, Jeremie Gilles<sup>5</sup>, Jérémy Bouyer<sup>5</sup>,  
7 Anicet G. Ouédraogo<sup>4</sup>, Jean-Baptiste Rayaisse<sup>3,6</sup>, Thierry Lefèvre<sup>1,2,3,7</sup> †, Kounbobr Roch  
8 Dabiré<sup>1,3</sup> †

9

10 <sup>1</sup> Institut de Recherche en Sciences de la Santé, Bobo-Dioulasso, Burkina Faso.

11 <sup>2</sup> MIVEGEC, Montpellier University, IRD, CNRS, Montpellier, France.

12 <sup>3</sup> Laboratoire mixte international sur les vecteurs (LAMIVECT), Bobo Dioulasso, Burkina  
13 Faso.

14 <sup>4</sup> Université Nazi Boni, Bobo Dioulasso, Burkina Faso.

15 <sup>5</sup> Insect Pest Control Laboratory, Joint FAO/IAEA Division of Nuclear Techniques in Food  
16 and Agriculture, Vienna, Austria.

17 <sup>6</sup> Centre International de Recherche-Développement sur l'Élevage en zone Subhumide, Bobo-  
18 Dioulasso, Burkina Faso.

19 <sup>7</sup> Centre de Recherche en Écologie et Évolution de la Santé (CREES), Montpellier, France

20

21

22 \* Corresponding author: [edwigequissou@yahoo.fr](mailto:edwigequissou@yahoo.fr)

23 † contributed equally to this work

24 **Abstract**

25

26 **Background:** The sterile insect technique (SIT) is a vector control strategy relying on the mass  
27 release of sterile males into wild vector populations. Current sex separation techniques are not  
28 fully efficient and could lead to the release of a small proportion of females. It is therefore  
29 important to evaluate the effect of irradiation on the ability of released females to transmit  
30 pathogens. This study aimed to assess the effect of irradiation on the survival and competence  
31 of *Anopheles arabiensis* females for *Plasmodium falciparum* in laboratory conditions.

32 **Methods:** Pupae were irradiated at 95 Gy, a sterilizing dose of gamma-rays from Caesium-137  
33 source, and emerging adult females were challenged with one of 14 natural isolates of *P.*  
34 *falciparum*. Seven days post-bloodmeal (dpbm), irradiated and unirradiated-control females  
35 were dissected to assess the presence of oocysts. On 14 dpbm, oocyst rupture in mosquito  
36 midguts and sporozoite dissemination in head/thoraces were also examined. Two assays were  
37 performed to gauge the effect of irradiation on *An. arabiensis* survival. First, the survivorship  
38 of irradiated and unirradiated-control mosquitoes exposed to each parasite isolate was  
39 monitored. Second, how parasite infection and irradiation interact to influence mosquito  
40 lifespan was also assessed by including a group of uninfected unirradiated mosquitoes.

41 **Results:** Overall, irradiation reduced the proportion of infected mosquitoes but this effect was  
42 inconsistent among parasite isolates. Second, there was no significant effect of irradiation on  
43 the number of developing oocysts. Third, the proportion of ruptured oocysts at 14 dpbm was  
44 higher in irradiated- than in control-unirradiated females, suggesting that irradiation might  
45 speed up parasite development. Fourth, irradiation had varying effects on female survival with  
46 either a negative effect (assay 1) or no effect (assay 2).

47 **Conclusion:** Combining these effects into an epidemiological model could help quantifying the  
48 net effect of irradiation on malaria transmission in this system. Together, our data indicate that  
49 irradiated female *An. arabiensis* could contribute to malaria transmission, and highlight the  
50 need for perfect sexing tools which would prevent the release of females as part of SIT  
51 programs.

52

53 **Key words:** Sterile Insect Technique (SIT), competence, Direct membrane feeding assay

54

55

56

57

## 58 **Introduction**

59           The worldwide annual incidence of malaria declined by 36 % between 2000 and 2015  
60 (Cibulskis *et al.*, 2016). Control measures based on vector management have played an  
61 important role in reducing malaria transmission with, for example, the use of long-lasting  
62 insecticide-treated nets contributing to an estimated 68 % of the decline in *Plasmodium*  
63 *falciparum* incidence over this period (Bhatt *et al.*, 2015). Since 2015 however, global progress  
64 has stalled, and several African countries are currently experiencing an increase in malaria  
65 incidence (WHO, 2018). The reasons for these recent increases are unclear but current vector  
66 control techniques are showing some limitations. This may include a loss of motivation in tool  
67 use (Pulford *et al.*, 2011), and/or vector adaptations such as physiological and behavioral  
68 resistance to insecticides (Ranson *et al.*, 2011; Carrasco *et al.*, 2019).

69           Although improving the use of existing and available tools is essential for malaria  
70 control in the near future, there also is an urgent need for the development and implementation  
71 of alternative solutions (Feachem *et al.*, 2019). One of them is based on the Sterile Insect  
72 Technique (SIT), which aims to control vector populations by releasing sterile males. SIT relies  
73 on the massive production of sterile males by irradiation or chemical treatment and  
74 introduction into wild insect populations in order to reduce the number of adults in subsequent  
75 generations (Knipling, 1955; Knipling *et al.*, 1968; Robinson *et al.*, 2009). With repeated  
76 releases, this approach has proven successful in eliminating some agricultural pest species  
77 (Dyck, Hendrichs and Robinson, 2005), and has shown promising in suppressing or reducing  
78 the density of disease vectors from islands (Vreysen *et al.*, 2000) or from relatively isolated  
79 areas such as urban settings (Bellini *et al.*, 2013). More recently, it allowed eliminating two  
80 partially isolated populations of *Aedes albopictus* in Guangzhou, China, when used in  
81 combination with the incompatible insect technique (Zheng *et al.*, 2019).

82 In recent years, the joint FAO/IAEA program has spurred renewed interest in the  
83 development of SIT approaches for the control of mosquito-borne diseases (Lees *et al.*, 2015;  
84 Flores and O'Neill, 2018). With regard to malaria, *Anopheles arabiensis* has focused much of  
85 the scientific attention as this species can display localized, narrow range distribution such as  
86 river side (Ageep *et al.*, 2009) or urban areas (Dabiré *et al.*, 2014; Azrag and Mohammed,  
87 2018). Accordingly, the radiation biology of this species has been relatively well studied  
88 (Helinski, Parker and Knols, 2006; Helinski *et al.*, 2008; Helinski and Knols, 2009; Balestrino  
89 *et al.*, 2011; Damiens *et al.*, 2012; Ndo *et al.*, 2014). Besides efficient mass-rearing and optimal  
90 level of irradiation ensuring male sterilization with limited impact on sexual competitiveness,  
91 a perfect separation technique of male and female mosquitoes prior to release is essential  
92 (Mashatola *et al.*, 2018).

93 To date, the available sexing tools, including pupal size, addition of toxicants to  
94 bloodmeal sources, or development of genetic sexing strains, remain imperfect; and a small  
95 proportion of females can escape sexing before irradiation (Papathanos *et al.*, 2009; Ndo *et al.*,  
96 2014; Dandalo *et al.*, 2017; Mashatola *et al.*, 2018). These females will be irradiated with the  
97 males and can therefore potentially contribute to malaria transmission when released into wild  
98 populations. While efforts to find an effective and operational sex separation technique are  
99 maintained, it is important to evaluate the effect of irradiation on the ability of female anopheles  
100 to transmit *P. falciparum*. Previous work has focused on the influence of irradiation on a large  
101 range of traits including sperm production (Helinski and Knols, 2008, 2009; Damiens, Vreysen  
102 and Gilles, 2013), male competitiveness (Helinski and Knols, 2008, 2009; Yamada *et al.*, 2014),  
103 male and female longevity (Helinski, Parker and Knols, 2006; Dandalo *et al.*, 2017),  
104 insemination rate (Poda *et al.*, 2018), oviposition behavior (Poda *et al.*, 2018), fertility and  
105 fecundity (Helinski, Parker and Knols, 2006; Poda *et al.*, 2018) but no study has, to our

106 knowledge, characterized the influence of irradiation on the competence of *An. arabiensis* for  
107 *P. falciparum*.

108 Competence, the mosquito ability to ensure parasite development and transmission, is a  
109 combined estimate of parasite infectivity and vector susceptibility to infection. It thus  
110 encompasses both mosquito resistance mechanisms used to fight the infection and parasite  
111 mechanisms used to overcome the vector's defenses (Lefevre *et al.*, 2018). The molecular and  
112 genetic bases of mosquito competence for malaria parasites have been well characterized for a  
113 number of mosquito–parasite associations (Molina-Cruz *et al.*, 2015, 2016) and, there also is a  
114 great diversity of ways in which biotic and abiotic environmental factors (temperature,  
115 mosquito diet, insecticide exposure, microbial gut flora, etc.) can affect mosquito competence  
116 (Lefèvre *et al.*, 2013). As any other environmental factors, radiation has also the potential to  
117 influence the competence of *Anopheles* vectors for *P. falciparum*. For example, *Aedes aegypti*  
118 mosquitoes exposed to a 5000 roentgen dose of X rays-irradiation and infected with a strain of  
119 *P. gallinaceum* showed a 2.7 fold reduction in oocyst number compared to unirradiated infected  
120 counterparts (Terzian, 1953), thereby suggesting a potential negative effect of irradiation on  
121 mosquito competence for malaria parasites (see also Hahn, Haas and Wilcox, 1950; Ward, Bell  
122 and Schneider, 1960). In contrast, a study on anopheles mosquitoes found that adult gamma-  
123 irradiated *An. quadrimaculatus* displayed increased susceptibility to the nematode *Dirofilaria*  
124 *uniformis* (Duxbury and Sadun, 1963).

125 The current study aimed to evaluate the effect of a sterilizing dose of gamma-rays from  
126 Caesium-137 source on mosquito competence using the parasite *P. falciparum*, responsible for  
127 causing the most severe form of human malaria, and the mosquito *An. arabiensis*, a major vector  
128 of *P. falciparum* in Africa. Females of *An. arabiensis* were challenged with sympatric field  
129 isolates of *P. falciparum* (14 distinct isolates in total) using direct membrane feeding assays  
130 and, through a series of experiments, the effects of irradiation on (i) mosquito competence at

131 two distinct time points over the course of infection (oocyst and sporozoite parasite  
132 developmental stages), (ii) the timing of oocyst rupture and sporozoite dissemination, and (iii)  
133 female survival, were examined.

134

## 135 **Methodology**

### 136 **Mosquitoes**

137 Laboratory-reared *An. arabiensis* were obtained from an outbred colony established in  
138 2016 and repeatedly replenished with F1 from wild-caught mosquito females collected in  
139 Dioulassoba, a central urban area of Bobo-Dioulasso, south-western Burkina Faso, and  
140 identified by routine PCR-RFLP (Fanello, Santolamazza and Della Torre, 2002). Mosquitoes  
141 were held in 30 × 30 × 30 cm mesh-covered cages under standard insectary conditions (27 ±  
142 2°C, 70 ± 5 % relative humidity, 12:12 LD).

### 143 **Irradiation**

144 Irradiation was performed as described in (Poda *et al.*, 2018). Prior to irradiation, pupae  
145 were transferred from their rearing trays to plastic cups (Ø = 45mm, h = 85mm) at similar  
146 densities. Cups were randomly assigned to one of two treatment groups: irradiation or control-  
147 unirradiated. The pupae density in cups was similar between the two treatment groups and did  
148 not exceed 200 pupae per cup. One cm of water was left at the bottom of each cup to limit  
149 radiation absorbance by water. Pupae were irradiated at a dose of 95.4 ± 0.9 Gy (mean±se) in a  
150 Gamma Cell <sup>137</sup>Cs self-contained gamma source at a rate of 4Gy/min. In *An. arabiensis* males,  
151 this dose induces a high level of sterility (Helinski, Parker and Knols, 2006; Poda *et al.*, 2018)  
152 while preserving relatively high competitiveness (Helinski, Parker and Knols, 2006). Cups were  
153 placed at the center of the irradiation chamber to maximize dose uniformity within the batch.  
154 A dosimetry system was used to measure the accurate dose received by each batch using a  
155 Gafchromic® HD-V2 film (Ashland, Bridgewater, NJ, USA) placed on the wall of the cups.

156 After irradiation, the optical density of irradiated films was read at both 458nm and 590nm with  
157 a dose reader (Dosereader4, Radgen, Budapest, Hungary) and compared to a control. The  
158 control group was manipulated in the same way as the irradiated group but was not irradiated.  
159 Pupae were then placed in 30 × 30 × 30 cm mesh-covered cages and kept under standard  
160 insectary conditions (27 ± 2°C, 70 ± 10 % RH, 12:12 LD) for emergence. Female and male  
161 mosquitoes were maintained together on a 5 % glucose solution. Between 3 and 6 days after  
162 emergence, control and irradiated females were transferred to cardboard cups (Ø = 75mm, h =  
163 85mm) at a density of 60 mosquitoes per cup.

164

### 165 **Parasite isolates and mosquito experimental infection**

166 Irradiated and control mosquito females were challenged by using blood drawn from  
167 naturally *P. falciparum* gametocyte-infected patients recruited among 5–12-year-old school  
168 children in villages surrounding Bobo-Dioulasso, Burkina Faso, using Direct Membrane  
169 Feeding Assays (DMFA) as previously described (Ouédraogo *et al.*, 2013; Hien *et al.*, 2016).  
170 Briefly, thick blood smears were taken from each volunteer, air-dried, Giemsa-stained, and  
171 examined by microscopy for the presence of *P. falciparum* at the IRSS lab in Bobo-Dioulasso.  
172 Asexual trophozoite parasite stages were counted against 200 leucocytes, while infectious  
173 gametocytes stages were counted against 1000 leukocytes. Children with asexual parasitemia  
174 of > 1,000 parasites per microliter (estimated based on an average of 8000 leucocytes/ml) were  
175 treated in accordance with national guidelines. Asymptomatic *P. falciparum* gametocyte-  
176 positive children were recruited for the study.

177 Gametocyte carrier blood was collected by venipuncture into heparinized tubes. To test  
178 for a possible interaction between the natural blocking immunity of the human host (Gouagna  
179 *et al.*, 2004; Da *et al.*, 2015; Stone *et al.*, 2018) and the irradiation on mosquito infection,  
180 DMFA were performed using either whole donor blood or with replacement of the serum by a

181 non-immune AB serum (see Additional file 1). Mosquitoes were starved of glucose solution for  
182 12 h prior to the exposure. Three to six day old female mosquitoes, emerged from irradiated or  
183 control pupae, were allowed to feed on this blood for one hour. Non-fed or partially fed females  
184 were removed and discarded, while the remaining fully-engorged mosquitoes were maintained  
185 in a biosafety room under standard insectary conditions ( $27 \pm 2^\circ\text{C}$ ,  $70 \pm 10\%$  RH, 12:12 LD).  
186 Mosquitoes were provided with a sugar meal consisting in a 5 % glucose solution on cotton  
187 wool following blood-feeding.

188

189 **Experiment 1: Effects of irradiation on *An. arabiensis* competence for *P.***  
190 ***falciparum*.**

191 Competence was characterized by infection prevalence (i.e. the proportion of  
192 mosquitoes that develop infection upon feeding on an infectious bloodmeal) and intensity (i.e.  
193 the average number of parasites among infected mosquitoes). Infection prevalence and intensity  
194 were here gauged at two distinct points in time over the course of infection (Table 1):

195 (i) On day 7 post-bloodmeal (dpbm), the midguts of a total of 383 irradiated females and  
196 378 control females fed with blood from one of 8 gametocyte carriers (Table 1) were dissected,  
197 stained with 2 % mercurochrome, and the presence and number of oocysts (immature, non-  
198 transmissible stage of malaria parasites) were recorded using light under the microscopy  
199 ( $\times 400$ ).

200 (ii) On 14 dpbm, the heads and thoraces of a total of 473 irradiated and 489 control females  
201 fed with blood from one of 10 gametocyte carriers (Table 1) were dissected, and the presence  
202 and quantity of sporozoites (mature transmissible stage) were determined using qPCR (see  
203 below).

204



205           **Experiment 2: Effects of irradiation on *P. falciparum* oocyst rupture in mosquito**  
206           **midguts and sporozoite dissemination in head/thoraces**

207           On 14 dpbm, 276 irradiated and 243 control mosquito females fed an infectious blood from  
208 one of 6 gametocyte carriers were dissected for the microscopic observation of oocysts in  
209 midguts and the qPCR detection of sporozoites in head/thoraces (Table 1). Oocyst rupture in  
210 mosquito midgut and sporozoite invasion of salivary glands is highly asynchronous: while some  
211 oocysts are intact and keep developing on 14 dpbm, others have already ruptured and released  
212 their sporozoites. To explore possible difference in the timing of sporozoite dissemination in  
213 mosquito salivary glands between irradiated and control females, three traits were measured:

- 214           (i)     the proportion of infected mosquitoes with ruptured oocysts on 14 dpbm. This is the  
215                 number of mosquitoes with at least one ruptured oocyst in their midguts at 14 dpbm  
216                 out of the total number of infected mosquitoes (i.e. harboring either intact and/or  
217                 ruptured oocysts);
- 218           (ii)    the proportion of ruptured oocysts at 14 dpbm. This is, for each infected mosquito,  
219                 the number of ruptured oocysts out of the total number of oocysts (intact + ruptured);
- 220           (iii)  the proportion of oocyst-infected mosquitoes with sporozoites in their head and  
221                 thorax at 14 dpbm. This is the number of oocyst-infected mosquitoes harboring  
222                 sporozoites in their head/thoraces at 14 dpbm out of the total number of infected  
223                 mosquitoes (i.e. harboring either intact and/or ruptured oocysts).

224

225           **Experiment 3: Effects of irradiation on *An. arabiensis* survival**

226           Two assays were performed to gauge the effect of irradiation on *An. arabiensis* survival.  
227 First, as part of the previous experiments, the survivorship of irradiated and unirradiated-control  
228 mosquitoes exposed to each parasite isolate (n = 14 isolates) was monitored from 1 to 7 days  
229 post-treatment (isolates A, C, D and G) or from 1 to 14 dpbm (isolates E, H, I, J, K, L, M, N,

230 O, P). Every morning at 08:00, dead mosquitoes were removed and counted from each cage.  
231 The remaining alive mosquitoes used for midgut dissection at 7 and/or 14 dpbm (experiment 1)  
232 were considered in the analysis and given a censoring indicator of "0".

233 Second, to determine how parasite infection and irradiation interact to influence  
234 mosquito longevity, a membrane feeding assay was performed following the same general  
235 procedure as described above except that a group of uninfected control mosquitoes was added,  
236 and that survival was monitored until all the mosquitoes had died. Uninfected control  
237 mosquitoes received heat-treated gametocytic blood to kill the parasite gametocytes as  
238 previously described (Sangare *et al.*, 2013; Hien *et al.*, 2016; Nguyen *et al.*, 2017). For each  
239 group (irradiated-parasite exposed, irradiated-parasite unexposed, control-parasite exposed and  
240 control-parasite unexposed), between 40 and 60 females were placed in one of two 20 × 20 ×  
241 20 cm cages to avoid possible cage effect on mosquito survival. Females were fed a 2.5 %  
242 glucose solution every other day and provided water-soaked cottons ad libitum. Dead  
243 mosquitoes were counted from each cage (n = 8 cages) every morning at 8:00 and individually  
244 stored at -20°C to determine their infection status using qPCR (see below).

245

#### 246 ***Plasmodium falciparum* DNA extraction and qPCR**

247 *P. falciparum* genomic DNA was extracted from head-thorax mosquitoes by grinding  
248 tissues with a micro pestle in an extraction buffer (0.1 M Tris HCl, pH 8.0, 0.01 M EDTA, 1.4  
249 M NaCl, 2 % cetyltrimethyl ammonium bromide). The mixture was incubated at 65°C for ten  
250 min. Total DNA was extracted with chloroform, precipitated in isopropanol, washed in 70 %  
251 ethanol, and resuspended in sterile water (Morlais *et al.*, 2004). Parasite detection was carried  
252 out by qPCR, using *P. falciparum* mitochondrial DNA specific primers 5' -  
253 TTACATCAGGAATGTTTTGC-3' and qPCR-PfR 5' -ATATTGGGATCTCCTGCAAAT-3'  
254 (Boissière *et al.*, 2013).

## 255 **Statistical analyses**

256 All statistical analyses were performed in R (version 3.6.1). Logistic regression by  
257 generalized mixed linear models (GLMM, binomial errors, logit link; lme4 package) were used  
258 to test the effect of irradiation on (i) the prevalence of oocysts and sporozoites (experiment 1),  
259 (ii) the proportion of infected mosquitoes with ruptured oocysts (experiment 2), (iii) the  
260 proportion of ruptured oocysts (experiment 2), (iv) the proportion of oocyst-infected  
261 mosquitoes with sporozoites in their head and thorax (experiment 2). A GLMM with zero  
262 truncated negative binomial errors (glmmTMB package) was used to test the effect of  
263 irradiation on the oocyst intensity (experiment 1). A GLMM with Gaussian distribution (lme4  
264 package) was used to test the effect of irradiation on the sporozoite intensity (Ct: mean number  
265 of amplification cycle during qPCR, experiment 1). For each GLMM, the full model included  
266 irradiation treatment (irradiated vs. unirradiated-control) and gametocytemia (the mean number  
267 of gametocytes in parasite isolates) as fixed effects and parasite isolate as a random effect. The  
268 effect of irradiation on mosquito survivorship (survival assay 1) was analyzed using a Cox's  
269 proportional hazard regression mixed model (coxme package) with censoring and with parasite  
270 isolate set as a random factor. The effect of irradiation and infection on mosquito survivorship  
271 (survival assay 2) was analyzed using Cox's proportional hazard regression mixed model  
272 without censoring and with cage identity set as a random factor. Model simplification used  
273 stepwise removal of terms, followed by likelihood ratio tests (LRT). Term removals that  
274 significantly reduced explanatory power ( $P < 0.05$ ) were retained in the minimal adequate  
275 model.

276

## 277 **Ethical considerations**

278 The selection of parasite isolate was made from asymptomatic gametocyte carriers  
279 recruited among 5-12 year old children in the villages of the medical district of Dandé and

280 Soumouosso according to the protocol approved respectively by the Centre Muraz and IRSS  
281 ethics committees: A003-2012/CE-CM and 2017-003/MESRSI/CNRST/IRSS/CEIRES. Prior  
282 to inclusion, informed consent was obtained from parents or legal guardian. The protocol was  
283 in line with the 2002 Helsinki Declaration on Ethical Principles for Medical Research Involving  
284 Human Subjects.

285

## 286 **Results**

287

### 288 **Experiment 1: Effects of irradiation on *An. arabiensis* competence for *P. falciparum***

#### 289 **Oocyst prevalence and intensity at day 7 post-bloodmeal**

290 Irradiation reduced the proportion of infected mosquitoes by 16.8 % (180 infected  
291 control mosquitoes/378 = 47.6%; and 152 infected irradiated mosquitoes / 383 = 39.6%;  $LRT$   
292  $X^2_1 = 5.2$ ;  $P = 0.02$ ; Figure 1A). Although no significant effect of gametocytemia on oocyst  
293 prevalence was found ( $LRT X^2_1 = 0.2$ ;  $P = 0.65$ ), there was an interaction between irradiation  
294 and gametocytemia ( $LRT X^2_1 = 19.5$ ;  $P < 0.001$ ). In particular, while irradiation reduced  
295 mosquito infection rate of parasite isolates C, D, G, I, it had no effect on A, E and even slightly  
296 increased the infection rate of isolates H and J (Figure 1A).

297 The mean number of developing oocysts in infected females (i.e. intensity) was not  
298 significantly affected by irradiation ( $LRT X^2_1 = 0.0017$ ;  $P = 0.97$ , Figure 1B). Gametocytemia  
299 had no effect on intensity ( $LRT X^2_1 = 0.54$ ;  $P = 0.46$ , Figure 1B). There was a significant  
300 interaction between gametocytemia and treatment ( $LRT X^2_1 = 9.58$ ,  $P = 0.002$ , Figure 1B) such  
301 that irradiation either decreased (isolates A, G, H), increased (C, D) or had no effect (E, I, J) on  
302 oocyst intensity.

303

304

305 **Sporozoite prevalence and intensity at day 14 post-bloodmeal**

306 The proportion of mosquitoes with disseminated sporozoites in their head/thorax was  
307 similar between irradiated and control females (control: 248/489 = 50.7 ± 4 %; irradiated:  
308 257/473 = 54.3 ± 5 %,  $LRT X^2_1 = 2.56$ ,  $P = 0.11$ ; Figure 1C). There was no effect of  
309 gametocytemia on sporozoite prevalence ( $LRT X^2_1 = 0.12$ ,  $P = 0.73$ , Figure 1C), and a  
310 marginally non-significant interaction between irradiation and gametocytemia ( $LRT X^2_1 = 3.5$ ,  
311  $P = 0.06$ , Figure 1C).

312 The mean number of amplification cycle during qPCR (the lower the Ct, the higher the  
313 sporozoite intensity) did not vary with irradiation (mean Ct irradiated = 25.57 ± 0.32 (n = 257),  
314 mean Ct control = 26.02 ± 0.33 (n = 248),  $LRT X^2_1 = 0.55$ ,  $P = 0.46$ , Figure 1D). Gametocytemia  
315 had a significant effect on sporozoite intensity ( $LRT X^2_1 = 7.7$ ,  $P = 0.006$ ), with higher  
316 gametocyte density in blood leading to an increase in sporozoite density in mosquito head and  
317 thoraces. Finally, there was no interaction between irradiation and gametocytemia on sporozoite  
318 intensity ( $LRT X^2_1 = 0.04$ ,  $P = 0.85$ ).

319

320 **Experiment 2: Effects of irradiation on *P. falciparum* oocyst rupture in mosquito guts**  
321 **and sporozoite dissemination in head/thoraces**

322 Uninfected mosquitoes were excluded from the analysis and the parasite oocyst rupture  
323 in mosquito guts and sporozoite dissemination to head/thoraces were compared between  
324 irradiated and control infected individuals (N irradiated = 144/276 (52 %), N control = 124/243  
325 (51 %)). Among these infected mosquitoes, the proportion of individuals with at least one  
326 ruptured oocyst in their midgut at 14 dpbm was higher in irradiated females than in control  
327 counterparts ( $LRT X^2_1 = 5.8$ ,  $P = 0.016$ , Figure 2A). In particular, 86 % (124/144) of irradiated  
328 infected mosquitoes had at least one ruptured oocyst in their midguts, while only 75 % (93/124)

329 of control infected females exhibited ruptured oocysts. This result suggests that the release of  
330 sporozoites from oocysts happened earlier in irradiated than in control females.

331 In addition, the proportion of ruptured oocysts was higher in irradiated mosquitoes  
332 (irradiated: 1509 ruptured oocysts out of a total of 1817 counted oocysts (83 %), controls: 1443  
333 ruptured oocysts out of a total of 2068 counted oocysts (69.8 %),  $LRT X^2_1 = 85$ ,  $P < 0.001$ ,  
334 Figure 2B), further suggesting that irradiation speeded up oocyst maturation and sporozoite  
335 release.

336 Finally, the proportion of oocyst-infected mosquitoes with disseminated sporozoites in  
337 their head/thorax was not affected by irradiation treatment ( $LRT X^2_1 = 2$ ,  $P = 0.12$ , Figure 2C).  
338 There was no main effect of gametocytemia on the proportion of oocyst-infected mosquitoes  
339 with disseminated sporozoites in their head/thorax ( $LRT X^2_1 = 1.65$ ,  $P = 0.2$ ). There was a  
340 significant interaction between gametocytemia and treatment ( $LRT X^2_1 = 4.6$ ,  $P = 0.03$ ), with  
341 irradiation either decreasing (isolates M), or increasing (K, N, O, P) the proportion of oocyst-  
342 infected mosquitoes with disseminated sporozoites.

343

### 344 **Experiment 3: Effects of irradiation on *An. arabiensis* survival**

345 In the first assay, the survival of females exposed to one of 14 parasite isolates was  
346 monitored from 1 to 7 dpbm or from 1 to 14 dpbm (Table1). The overall survival rate from 1  
347 to 7 dpbm (isolates A, C, D, G) was very high, with only 3.9 % of mosquitoes (13 / 333) that  
348 died between 1 to 7 dpbm, and there was no survival difference between irradiated and control  
349 non-irradiated mosquitoes ( $LRT X^2_1 = 1$ ,  $P = 0.31$ , Figure 3A). However, from 1 to 14 dpbm  
350 (isolates E, H, I, J, K, L, M, N, O, P), irradiated mosquitoes died at a higher rate than control  
351 mosquitoes (mortality rate irradiated: 21.25 % (187 / 880), control: 11.71 % (94/803),  $LRT X^2_1$   
352 = 22.3,  $P < 0.001$ , Figure 3B).

353 In the second assay, the survival of irradiated mosquitoes exposed to parasites (n = 55),  
354 irradiated unexposed (n = 49), unirradiated exposed (n = 52) and unirradiated unexposed (n =  
355 45) females was monitored from 1 to 35 dpbm, when the last mosquito died. The DNA of  
356 parasite-exposed dead mosquitoes was extracted to detect the presence of *P. falciparum* using  
357 qPCR. Mosquitoes (irradiated or non-irradiated) which remained uninfected upon parasite  
358 exposure were excluded from the analysis to focus on the effect of infection and irradiation on  
359 mosquito survival. In this second assay using smaller number of mosquitoes (Table 1), there  
360 was no effect of irradiation on mosquito survival (LRT  $X^2_I = 0.04$ , P = 0.84, Figure 3C).  
361 Infection did not significantly reduce mosquito survival (LRT  $X^2_I = 0.05$ , P = 0.82, Figure 3C).  
362 Finally, there was a marginally significant interaction between irradiation and infection (LRT  
363  $X^2_I = 4$ , P = 0.045, Figure 3C), such that irradiation resulted in an increased lifespan in infected  
364 mosquitoes but caused a reduced lifespan in uninfected mosquitoes.

365

## 366 Discussion

367 Our data shows that irradiation had contrasting effects on critical parameters affecting  
368 the capacity of *An. arabiensis* to transmit *P. falciparum*, including mosquito competence, the  
369 parasite development time and survival. First, irradiation reduced the proportion of mosquitoes  
370 harboring parasite oocysts upon ingestion of bloodmeals from gametocyte carriers. Second,  
371 irradiation increased both the proportion of mosquitoes with ruptured oocysts and the  
372 proportion of ruptured oocysts in mosquito guts at 14 dpbm. Third, irradiation either decreased  
373 (survival assay 1) or had no effect (assay 2) on the lifespan of *An. arabiensis* females. While  
374 reduced mosquito competence and survival would limit *An. arabiensis* vectorial capacity,  
375 shorter parasite development time would tend to increase it. Combining these effects into an  
376 epidemiological model could help quantifying the net effect of irradiation on malaria  
377 transmission in this system.

378           Although irradiated females displayed reduced oocyst infection rate compared to non-  
379 irradiated individuals, the parasite development was not fully suppressed. If released into the  
380 wild, irradiated females will therefore likely contribute to malaria transmission, provided that  
381 irradiation does not impair the host-seeking and -feeding behaviors of these females. Our results  
382 therefore highlight the need for perfect sexing tools which would prevent the release of females  
383 as part of SIT programs.

384           The precise mechanisms behind irradiation-mediated reduction of *Plasmodium*  
385 infection are not yet clear but interferences with mosquito immunity, microbiota and/or parasite  
386 infectivity mechanisms are likely. Although it is well-known that irradiation causes DNA  
387 damages, oxidative stress, and changes in gene expression including immune genes  
388 (Zhikrevetskaya *et al.*, 2015), its impact on insect host-pathogen interactions remain generally  
389 unclear (Morley, 2012). While a study found that irradiated *Tephritidae* flies displayed  
390 damaged midgut and peritrophic membrane resulting in decreased bacterial growth (Lauzon  
391 and Potter, 2012), irradiated *Spodoptera* butterflies showed increased susceptibility to a  
392 nucleopolyhedrosis virus (Sayed and El-Helaly, 2018). Similarly, in mosquito-malaria parasites  
393 associations, X-ray irradiation caused increased *Ae. aegypti* resistance to *P. gallinaceum*  
394 (Terzian, 1953; Ward, Bell and Schneider, 1960), while gamma-ray irradiation enhanced the  
395 development of *Dirofilaria uniformis* in *Anopheles quadrimaculatus* (Duxbury and Sadun,  
396 1963). Together, the few existing studies on this topic suggest that the observed changes in  
397 infection level are mediated mostly through radiation damage to the insect midgut rather than  
398 through altered immune response such as hemocyte production (Jafri, 1965; Christensen, Huff  
399 and Li, 1990; Morley, 2012). In addition, the effects of irradiation on infection seem to be dose-  
400 dependent. For example, at a dose of 1000 r of x-ray, the competence of *Ae. aegypti* to *P.*  
401 *gallinaceum* decreased by only 1.15 times compared to unirradiated-control mosquitoes; while  
402 at doses between 5,000 and 40,000 r, competence decreased by a factor of 2.75 to 4 (Terzian,



403 1953). Further investigations are required to determine whether the decreased susceptibility of  
404 irradiated *An. arabiensis* to *P. falciparum* oocysts is also dose-dependent.

405 In this study, the effect of irradiation on mosquito infection strongly varied among  
406 parasite isolates (Figure 1). Why irradiation reduced *An. arabiensis* competence for some  
407 parasite isolates and not others is unclear. We first postulated that the natural blocking immunity  
408 of the human host could play a role. To test this possibility, the natural serum of isolates K to P  
409 was replaced by naive AB serum (Gouagna *et al.*, 2004; Da *et al.*, 2015; Stone *et al.*, 2018)  
410 (Additional file 1). Similar to assays using unchanged natural serum (isolates A to J), assays  
411 with serum replacement showed either increased (L, N, O, and P) or decreased (K and M)  
412 infection in irradiated mosquitoes (Additional file 1: Figure S2). Because the characterization  
413 of vector competence for oocyst and sporozoite stages partly relied on different gametocyte  
414 carriers (Table 1), such isolate-dependent effect of irradiation could also explain why, on  
415 average, the sporozoite infection rate of irradiated individuals was not significantly lower than  
416 that of unirradiated-control individuals (Figure 1C). Here, we used wild parasite isolates from  
417 a geographic area characterized by an important genetic diversity (Somé *et al.*, 2018).  
418 Accordingly, some parasite clones might perform well in irradiated mosquitoes while others  
419 would be more infective to non-irradiated mosquitoes. Future genotyping studies of the parasite  
420 population used to perform the experimental infections of irradiated mosquitoes would be  
421 required to explore this possibility.

422 Our results suggest an earlier sporozoite invasion of salivary glands among irradiated  
423 females. This is supported by the higher proportion of infected mosquitoes with ruptured  
424 oocysts (Figure 2A), the higher proportion of ruptured oocysts (Figure 2B), and the higher  
425 proportion (although not significant) of infected mosquitoes with sporozoites at 14 dpbm  
426 (Figure 2C). Gamma-irradiation might speed up *Plasmodium* development within anopheles  
427 vectors. Shorter parasite's Extrinsic Incubation Period (EIP) following insect host irradiation

428 was previously described in *Trypanosoma spp* – infected tsetse flies (Moloo, 1982). In this  
429 system, the parasite migration to the haemocoel occurred earlier in irradiated than in  
430 unirradiated-control flies, possibly because of changes in the ultrastructural organization of the  
431 insect gut (Stiles *et al.*, 1989). Exploring the temporal dynamics of *P. falciparum* development  
432 using mosquitoes dissected at different time points during the course of infection would provide  
433 more detailed and robust information. The number of mosquitoes in our experiments was  
434 insufficient to perform such temporal monitoring of the EIP and future experiments are required  
435 to confirm our observations made at 14 dpbm.

436         The effects of irradiation on the survival of *An. arabiensis* females were inconsistent. In  
437 our first assay, the monitoring of 165 irradiated and 168 unirradiated-control females from 1 to  
438 7 dpbm following the ingestion of a gametocyte-infected bloodmeal revealed no effect of  
439 irradiation. Within this period, mosquito survival was very high with only 8 deaths in the  
440 unirradiated-control group and 5 in the irradiated group. However, when the monitoring  
441 expanded to 14 dpbm on much bigger sample size (880 irradiated and 803 unirradiated-control  
442 females), the irradiated group recorded twice as many deaths as the unirradiated-control group  
443 (21.25 % vs 11.71 %). Finally, no significant influence of irradiation was observed as part of  
444 the second survival assay in which 26 infected-irradiated, 49 uninfected-irradiated, 14 infected-  
445 unirradiated and 45 uninfected-unirradiated mosquitoes were monitored until all individuals  
446 had died. Unlike the first assay in which mosquitoes were maintained on a 5 % glucose solution  
447 ad libitum, mosquitoes received a 2.5 % glucose solution every other day in this second assay.  
448 This was supposed to induce nutritional stress in mosquitoes and help to better detect possible  
449 effects of radiation on survival (Roux *et al.*, 2015; Poda *et al.*, 2018). Inconsistent effects of  
450 irradiation on the survival of mosquito females were previously observed, with some studies  
451 reporting either lifespan reduction (Terzian, 1953; Brelsfoard, St Clair and Dobson, 2009), no  
452 effect (Darrow, 1968; Wakid *et al.*, 1976; Brelsfoard, St Clair and Dobson, 2009; Dandalo *et*

453 *al.*, 2017) or even increase (Brelsfoard, St Clair and Dobson, 2009). For example, in the  
454 mosquito *Ae. polynesiensis*, irradiation of females <24 hrs post-pupation at 20 Gy and 40 Gy  
455 induced a significant lifespan reduction compared to non-irradiated females, while irradiation  
456 at 30 Gy had no effect and irradiation at 40 Gy of females > 24 hrs post-pupation boosted female  
457 lifespan. If confirmed in field conditions, the irradiation-mediated reduction of mosquito  
458 lifespan observed from 1 to 14 dpbm would not be strong enough to prevent the completion of  
459 *Plasmodium* incubation period and hence the contribution of these females to malaria  
460 transmission (Brelsfoard, St Clair and Dobson, 2009).

461

## 462 **Conclusion**

463 Our data indicate that irradiation of female *An. arabiensis* can reduce competence and  
464 survival, but not to the point of preventing malaria transmission. Irradiated females therefore  
465 remain potential vectors and further studies are required to develop fully effective sexing tools  
466 to prevent possible releases of irradiated females into the wild. Until we find such sexing tools,  
467 it will be important to expand our knowledge on the radiation biology of female mosquito  
468 vectors.

## 469 **Abbreviations**

470 dpbm: days post-bloodmeal, SIT: Sterile Insect Technique, L:D: Light Dark, qPCR: Real-time  
471 Polymerase Chain Reaction. DMFA: Direct Membrane Feeding Assay

## 472 **Acknowledgements**

473 We would like to thank all volunteers for participating in this study as well as the local  
474 authorities for their support. We are very grateful to the IRSS staff in Burkina Faso for technical  
475 assistance.

## 476 **Availability of data and materials**

477 The raw datasets are available from the corresponding author

#### 478 **Authors' contributions**

479 EG, TL, KRD conceived and designed the study. EG and TL drafted the manuscript. EG and  
480 TL analysed the data. EG, SP, FdSDH conducted the experiments. JBR provided access to  
481 irradiation facilities. OR, TL, JG, JB and KRD supervised the study. All authors read, revised  
482 and approved the final manuscript.

#### 483 **Ethics approval and consent to participate**

484 The protocol was approved by the Centre Muraz and IRSS ethics committees: A003-2012/CE-  
485 CM and 2017-003/MESRSI/CNRST/IRSS/CEIRES. Prior to inclusion, informed consent was  
486 obtained from the parents or legal guardian of the volunteers.

#### 487 **Consent for publication**

488 NA

#### 489 **Competing interests**

490 We declare that no competing interests existed for the authors or the institutes before, during  
491 and after preparing and submitting this paper for review.

#### 492 **Funding**

493 This study was supported by the IAEA, ANR grants no.11-PDOC-006-01 and 16-CE35-0007  
494 and an IRD LMI LAMIVECT incentive grant to EG.

495

496

497

498

499

## 500 References

- 501 Ageep, T. B. *et al.* (2009) ‘Spatial and temporal distribution of the malaria mosquito  
502 *Anopheles arabiensis* in northern Sudan: Influence of environmental factors and implications  
503 for vector control’, *Malaria Journal*. doi: 10.1186/1475-2875-8-123.
- 504 Azrag, R. S. and Mohammed, B. H. (2018) ‘*Anopheles arabiensis* in Sudan: A noticeable  
505 tolerance to urban polluted larval habitats associated with resistance to Temephos’, *Malaria*  
506 *Journal*. doi: 10.1186/s12936-018-2350-1.
- 507 Balestrino, F. *et al.* (2011) ‘Mosquito Mass Rearing Technology: A Cold-Water Vortex  
508 Device for Continuous Unattended Separation of *Anopheles arabiensis* Pupae from Larvae’,  
509 *Journal of the American Mosquito Control Association*. doi: 10.2987/10-6085.1.
- 510 Bellini, R. *et al.* (2013) ‘Pilot Field Trials With *Aedes albopictus* Irradiated Sterile Males in  
511 Italian Urban Areas’, *Journal of Medical Entomology*. doi: 10.1603/me12048.
- 512 Bhatt, S. *et al.* (2015) ‘The effect of malaria control on *Plasmodium falciparum* in Africa  
513 between 2000 and 2015’, *Nature*, 526, pp. 207–211. doi: 10.1038/nature15535.
- 514 Boissière, A. *et al.* (2013) ‘Application of a qPCR assay in the investigation of susceptibility  
515 to malaria infection of the M and S molecular forms of *An. gambiae s.s.* in Cameroon.’, *PloS*  
516 *one*, 8(1), p. e54820. doi: 10.1371/journal.pone.0054820.
- 517 Brelsfoard, C. L., St Clair, W. and Dobson, S. L. (2009) ‘Integration of irradiation with  
518 cytoplasmic incompatibility to facilitate a lymphatic filariasis vector elimination approach’,  
519 *Parasites and Vectors*, 2(1), pp. 1–8. doi: 10.1186/1756-3305-2-38.
- 520 Carrasco, D. *et al.* (2019) ‘Behavioural adaptations of mosquito vectors to insecticide  
521 control’, *Current Opinion in Insect Science*. doi: 10.1016/j.cois.2019.03.005.
- 522 Christensen, B. M., Huff, B. M. and Li, J. (1990) ‘Effect of  $\gamma$  irradiation on the hemocyte-  
523 mediated immune response of *Aedes aegypti* against microfilariae’, *Journal of Invertebrate*  
524 *Pathology*. doi: 10.1016/0022-2011(90)90153-W.
- 525 Cibulskis, R. E. *et al.* (2016) ‘Malaria: Global progress 2000 - 2015 and future challenges’,  
526 *Infectious Diseases of Poverty*. BioMed Central Ltd. doi: 10.1186/s40249-016-0151-8.
- 527 Da, D. F. *et al.* (2015) ‘Experimental study of the relationship between *Plasmodium*  
528 gametocyte density and infection success in mosquitoes: implications for the evaluation of  
529 malaria transmission-reducing interventions’, *Experimental Parasitology*. The Authors, 149,  
530 pp. 74–83. doi: 10.1016/j.exppara.2014.12.010.
- 531 Dabiré, K. R. *et al.* (2014) ‘Occurrence of natural *Anopheles arabiensis* swarms in an urban  
532 area of Bobo-Dioulasso city, Burkina Faso, West Africa’, *Acta Tropica*, 130, pp. 44–50. doi:  
533 10.1016/j.actatropica.2013.09.016.
- 534 Damians, D. *et al.* (2012) ‘An Inexpensive and Effective Larval Diet for *Anopheles arabiensis*  
535 (*Diptera: Culicidae*): Eat Like a Horse, a Bird, or a Fish?’, *Journal of Medical Entomology*,  
536 49(5), pp. 1001–1011. doi: 10.1603/me11289.
- 537 Damians, D., Vreysen, M. J. B. and Gilles, J. R. L. (2013) ‘<I>*Anopheles arabiensis*</I>  
538 Sperm Production After Genetic Manipulation, Dieldrin Treatment, and Irradiation’, *Journal*  
539 *of Medical Entomology*. doi: 10.1603/me12058.
- 540 Dandolo, L. C. *et al.* (2017) ‘Effect of ionising (gamma) radiation on female *Anopheles*

- 541 *arabiensis*', *Transactions of the Royal Society of Tropical Medicine and Hygiene*, 111(1), pp.  
542 38–40. doi: 10.1093/trstmh/trx013.
- 543 Darrow, D. I. (1968) 'The effect of gamma irradiation on reproduction and life span of the  
544 mosquito *Culex tarsalis* Coquillett', *Mosquito News*, 28(2), pp. 21–24. Available at:  
545 file:///y:/2406.pdf.
- 546 Duxbury, R. E. and Sadun, E. H. (1963) 'Effects of Gamma Radiation on Development of  
547 *Dirofilaria uniformis* in *Anopheles quadrimaculatus*', *Proc. Helm. Soc. Wash.*, 30(2), pp.  
548 263–265. Available at: <http://bionames.org/archive/issn/0018-0130/30/263.pdf>.
- 549 Dyck, V. A., Hendrichs, J. and Robinson, A. S. (2005) 'Sterile insect technique: Principles  
550 and practice in area-wide integrated pest management', *Springer Netherlands*, 43, pp. 525–  
551 545. doi: 10.5860/CHOICE.43-5894.
- 552 Fanello, C., Santolamazza, F. and Della Torre, A. (2002) 'Simultaneous identification of  
553 species and molecular forms of the *Anopheles gambiae* complex by PCR-RFLP', *Medical and*  
554 *Veterinary Entomology*. doi: 10.1046/j.1365-2915.2002.00393.x.
- 555 Feachem, R. G. A. *et al.* (2019) 'Malaria eradication within a generation: ambitious,  
556 achievable, and necessary', *The Lancet*. doi: 10.1016/S0140-6736(19)31139-0.
- 557 Flores, H. A. and O'Neill, S. L. (2018) 'Controlling vector-borne diseases by releasing  
558 modified mosquitoes', *Nature Reviews Microbiology*. doi: 10.1038/s41579-018-0025-0.
- 559 Gouagna, L. C. *et al.* (2004) 'Stage-specific effects of host plasma factors on the early  
560 sporogony of autologous *Plasmodium falciparum* isolates within *Anopheles gambiae*',  
561 *Tropical Medicine and International Health*, 9, pp. 937–948. doi: 10.1111/j.1365-  
562 3156.2004.01300.x.
- 563 Hahn, P. F., Haas, V. H. and Wilcox, A. (1950) 'Arrest of development of *Plasmodium*  
564 *gallinaceum* in mosquitoes (*Aedes aegypti*) by radiation effect of P32', *Science*. doi:  
565 10.1126/science.111.2894.657.
- 566 Helinski, M. E. H. *et al.* (2008) 'Towards a sterile insect technique field release of *Anopheles*  
567 *arabiensis* mosquitoes in Sudan: Irradiation, transportation and field cage experimentation',  
568 *Malaria Journal*, 7, pp. 1–10. doi: 10.1186/1475-2875-7-65.
- 569 Helinski, M. E. H. and Knols, B. G. J. (2008) 'Mating Competitiveness of Male  
570 *Anopheles arabiensis* Mosquitoes Irradiated with a Partially or Fully Sterilizing Dose  
571 in Small and Large Laboratory Cages', *Journal of Medical Entomology*. doi: 10.1603/0022-  
572 2585(2008)45[698:mcomaa]2.0.co;2.
- 573 Helinski, M. E. H. and Knols, B. G. J. (2009) 'The influence of late-stage pupal irradiation  
574 and increased irradiated: Un-irradiated male ratio on mating competitiveness of the malaria  
575 mosquito *Anopheles arabiensis* patton', *Bulletin of Entomological Research*. doi:  
576 10.1017/S0007485308006354.
- 577 Helinski, M. E. H., Parker, A. G. and Knols, B. G. J. (2006) 'Radiation-induced sterility for  
578 pupal and adult stages of the malaria mosquito *Anopheles arabiensis*.' , *Malaria Journal*, 5,  
579 pp. 1–10. doi: 10.1186/1475-2875-5-41.
- 580 Hien, D. F. *et al.* (2016) 'Plant-mediated effects on mosquito capacity to transmit human  
581 malaria', *PLoS Pathogens*, 12(8), p. e1005773. doi: 10.5061/dryad.9s690.Funding.
- 582 Jafri, R. H. (1965) 'Influence of pathogens on the life span of irradiated insects', *Journal of*

- 583 *Invertebrate Pathology*. doi: 10.1016/0022-2011(65)90154-0.
- 584 Knipling, E. F. (1955) ‘Possibilities of insect control or eradication through the use of  
585 sexually sterile males’, *Journal of Economic Entomology*, 48, pp. 459–462. doi:  
586 10.1126/science.130.3380.902.
- 587 Knipling, E. F. *et al.* (1968) ‘Genetic control of insects of public health importance.’, *Bulletin*  
588 *of the World Health Organization*, 38, pp. 421–438.
- 589 Lauzon, C. R. and Potter, S. E. (2012) ‘Description of the irradiated and nonirradiated midgut  
590 of *Ceratitis capitata* Wiedemann (*Diptera: Tephritidae*) and *Anastrepha ludens* Loew  
591 (*Diptera: Tephritidae*) used for sterile insect technique’, *Journal of Pest Science*. doi:  
592 10.1007/s10340-011-0410-1.
- 593 Lees, R. S. *et al.* (2015) ‘Back to the future: The sterile insect technique against mosquito  
594 disease vectors’, *Current Opinion in Insect Science*, 10, pp. 156–162. doi:  
595 10.1016/j.cois.2015.05.011.
- 596 Lefevre, T. *et al.* (2018) ‘Transmission traits of malaria parasites within the mosquito:  
597 Genetic variation, phenotypic plasticity, and consequences for control’, *Evolutionary*  
598 *Applications*. doi: 10.1111/eva.12571.
- 599 Lefèvre, T. *et al.* (2013) ‘Non-genetic determinants of mosquito competence for malaria  
600 parasites’, *PLoS Pathogens*, p. e1003365. doi: 10.1371/journal.ppat.1003365.
- 601 Mashatola, T. *et al.* (2018) ‘A review on the progress of sex-separation techniques for sterile  
602 insect technique applications against *Anopheles arabiensis*’, *Parasites and Vectors*. doi:  
603 10.1186/s13071-018-3219-4.
- 604 Molina-Cruz, A. *et al.* (2015) ‘*Plasmodium* evasion of mosquito immunity and global malaria  
605 transmission: The lock-and-key theory’, *Proceedings of the National Academy of Sciences of*  
606 *the United States of America*. doi: 10.1073/pnas.1520426112.
- 607 Molina-Cruz, A. *et al.* (2016) ‘Mosquito Vectors and the Globalization of *Plasmodium*  
608 *falciparum* Malaria’, *Annual Review of Genetics*. doi: 10.1146/annurev-genet-120215-  
609 035211.
- 610 Mooloo, S. K. (1982) ‘Cyclical Transmission of Pathogenic Trypanosoma Species by Gamma-  
611 Irradiated Sterile Male *Glossina Morsitans Morsitans*’, *Parasitology*. doi:  
612 10.1017/S003118200004484X.
- 613 Morlais, I. *et al.* (2004) ‘Intraspecific nucleotide variation in *Anopheles gambiae*: New  
614 insights into the biology of malaria vectors’, *American Journal of Tropical Medicine and*  
615 *Hygiene*. doi: 10.4269/ajtmh.2004.71.795.
- 616 Morley, N. J. (2012) ‘The effects of radioactive pollution on the dynamics of infectious  
617 diseases in wildlife’, *Journal of Environmental Radioactivity*. doi:  
618 10.1016/j.jenvrad.2011.12.019.
- 619 Ndo, C. *et al.* (2014) ‘X-ray sterilization of the *An. arabiensis* genetic sexing strain “ANO  
620 IPCL1” at pupal and adult stages’, *Acta Tropica*, 131, pp. 124–128. doi:  
621 10.1016/j.actatropica.2013.11.027.
- 622 Nguyen, P. L. *et al.* (2017) ‘No evidence for manipulation of *Anopheles gambiae*, *An.*  
623 *coluzzii* and *Plasmodium falciparum*’, *Scientific Reports*, 7, pp. 1–11. doi: 10.1038/s41598-  
624 017-09821-x.

- 625 Ouédraogo, A. L. *et al.* (2013) 'A protocol for membrane feeding assays to determine the  
626 infectiousness of *P. falciparum* naturally infected individuals to *Anopheles gambia*', *Malaria*  
627 *World Journal*, 4(16), pp. 17–20.
- 628 Papathanos, P. A. *et al.* (2009) 'Sex separation strategies: Past experience and new  
629 approaches', *Malaria Journal*, 8, pp. 1–8. doi: 10.1186/1475-2875-8-S2-S5.
- 630 Poda, S. B. *et al.* (2018) 'Impact of irradiation on the reproductive traits of field and  
631 laboratory *An. arabiensis* mosquitoes'. *Parasites & Vectors*, pp. 1–12.
- 632 Pulford, J. *et al.* (2011) 'Reported reasons for not using a mosquito net when one is available:  
633 A review of the published literature', *Malaria Journal*. doi: 10.1186/1475-2875-10-83.
- 634 Ranson, H. *et al.* (2011) 'Pyrethroid resistance in African anopheline mosquitoes: What are  
635 the implications for malaria control?', *Trends in Parasitology*, pp. 91–98. doi:  
636 10.1016/j.pt.2010.08.004.
- 637 Robinson, A. S. *et al.* (2009) 'Conceptual framework and rationale', *Malaria Journal*, 8, pp.  
638 1–9. doi: 10.1186/1475-2875-8-S2-S1.
- 639 Roux, O. *et al.* (2015) 'Evidence for carry-over effects of predator exposure on pathogen  
640 transmission potential', *Proceedings of the Royal Society B: Biological Sciences*, 282, pp. 1–  
641 9. doi: 10.1098/rspb.2015.2430.
- 642 Sangare, I. *et al.* (2013) 'Studying fitness cost of *Plasmodium falciparum* infection in malaria  
643 vectors: validation of an appropriate negative control', *Malar J*, 12, p. 2.
- 644 Sayed, W. A. A.-E. and El-Helaly, A. M. A. (2018) 'Effect of gamma irradiation on the  
645 susceptibility of the cotton leaf worm, *Spodoptera littoralis* (Boisd.) (Lepidoptera: Noctuidae)  
646 to the infection with nucleopolyhedrosis virus', *Egyptian Journal of Biological Pest Control*.  
647 doi: 10.1186/s41938-018-0082-8.
- 648 Somé, A. F. *et al.* (2018) '*Plasmodium falciparum* msp1 and msp2 genetic diversity and allele  
649 frequencies in parasites isolated from symptomatic malaria patients in Bobo-Dioulasso,  
650 Burkina Faso', *Parasites and Vectors*. doi: 10.1186/s13071-018-2895-4.
- 651 Stiles, J. K. *et al.* (1989) 'Effects of  $\gamma$  Irradiation on the Midgut Ultrastructure of *Glossina*  
652 *palpalis* Subspecies Effects of  $\gamma$  Irradiation on the Midgut Ultrastructure of *Glossina palpalis*  
653 Subspecies', *Radiation Research*. doi: 10.2307/3577449.
- 654 Stone, W. J. R. *et al.* (2018) 'Unravelling the immune signature of *Plasmodium falciparum*  
655 transmission-reducing immunity', *Nature Communications*. doi: 10.1038/s41467-017-02646-  
656 2.
- 657 Terzian, L. A. (1953) 'The Effect of X-irradiation on the immunity of mosquitoes to malarial  
658 infection', *The Journal of Immunology*, 71, pp. 202–206.
- 659 Vreysen, M. J. B. *et al.* (2000) '*Glossina austeni* (Diptera: Glossinidae) eradicated on the  
660 Island of Unguja, Zanzibar, using the sterile insect technique.', *Journal of Economic*  
661 *Entomology*, 93, pp. 123–135. doi: 10.1603/0022-0493-93.1.123.
- 662 Wakid, A. M. *et al.* (1976) 'Irradiation of the immature stages of the mosquito, *Anopheles*  
663 *pharoensis* Theob., with  $^{60}\text{Co}$ ', *Zeitschrift für Angewandte Entomologie*. doi: 10.1111/j.1439-  
664 0418.1976.tb03332.x.
- 665 Ward, R. A., Bell, L. H. and Schneider, R. L. (1960) 'Effects of x-irradiation on the  
666 development of malarial parasites in mosquitoes', *Experimental Parasitology*. doi:



667 10.1016/0014-4894(60)90070-9.

668 WHO (2018) *World malaria report 2018*. Geneva: World Health Organization; 2018, World  
669 *Malaria Report*. doi: ISBN 978 92 4 1564403.

670 Yamada, H. *et al.* (2014) ‘The effects of genetic manipulation, dieldrin treatment and  
671 irradiation on the mating competitiveness of male *Anopheles arabiensis* in field cages’,  
672 *Malaria Journal*. doi: 10.1186/1475-2875-13-318.

673 Zheng, X. *et al.* (2019) ‘Incompatible and sterile insect techniques combined eliminate  
674 mosquitoes’, *Nature*. doi: 10.1038/s41586-019-1407-9.

675 Zhikrevetskaya, S. *et al.* (2015) ‘Effect of low doses (5-40 cGy) of gamma-irradiation on  
676 lifespan and stress-related genes expression profile in *Drosophila melanogaster*’, *PLoS ONE*.  
677 doi: 10.1371/journal.pone.0133840.

678

679

680 **Table 1: Summary description of the experiments.**

| Experiment                                                                                                                                           | Time point | Parasites isolates (gam/μl)                                                     | Measured traits                                                                                                                                                                                                                  | Total sample size (N total)                                               |                                              |
|------------------------------------------------------------------------------------------------------------------------------------------------------|------------|---------------------------------------------------------------------------------|----------------------------------------------------------------------------------------------------------------------------------------------------------------------------------------------------------------------------------|---------------------------------------------------------------------------|----------------------------------------------|
|                                                                                                                                                      |            |                                                                                 |                                                                                                                                                                                                                                  | Mean ± se (median) [range] number of mosquitoes for each parasite isolate |                                              |
|                                                                                                                                                      |            |                                                                                 |                                                                                                                                                                                                                                  | irradiated                                                                | unirradiated-control                         |
| <b>Experiment 1:</b><br>Effects of irradiation on <i>An. arabiensis</i> competence for <i>P. falciparum</i>                                          | 7 dpbm     | A (64), C (160), D (88), E (32), G (48), H (56), I (48), J (32)                 | <b>Oocyst prevalence:</b> the number of mosquitoes harboring at least one oocyst in their midguts out of the total number of dissected mosquitoes                                                                                | N total = 383<br>47.875 ± 4.9 (50) [21-71]                                | N total = 378<br>47.25 ± 4.9 (51) [23-66]    |
|                                                                                                                                                      |            |                                                                                 | <b>Oocyst intensity:</b> the mean number of oocysts in infected mosquitoes                                                                                                                                                       | N total = 180<br>19 ± 2.7 (19.5) [5-31]                                   | N total = 152<br>22.5 ± 3.22 (20) [13-37]    |
|                                                                                                                                                      | 14 dpbm    | E (32), H (56), I (48), J (32), K (72), L (168), M (32), N (136), O (96), P(96) | <b>Sporozoite prevalence:</b> the number of mosquito head/thorax detected positive to <i>P. falciparum</i> using qPCR out of the total number of dissected head/thoraces                                                         | N total = 473<br>47.3 ± 3.7 (50) [17-55]                                  | N total = 489<br>48.9 ± 4.35 (48.5) [27-78]  |
|                                                                                                                                                      |            |                                                                                 | <b>Sporozoite intensity:</b> The mean number of amplification cycle during qPCR (the lower the Ct, the higher the sporozoite intensity)                                                                                          | N total = 257<br>25.7 ± 2.7 (26) [9-38]                                   | N total = 248<br>24.8 ± 4.7 (23.5) [7-59]    |
| <b>Experiment 2:</b><br>Effects of irradiation on <i>P. falciparum</i> oocyst rupture in mosquito guts and sporozoite dissemination in head/thoraces | 14 dpbm    | K (72), L (168), M (32), N (136), O (96), P (96)                                | <b>Proportion of infected mosquitoes with ruptured oocysts:</b> the number of mosquitoes with at least one ruptured oocyst out of the total number of infected mosquitoes (i.e. harboring either intact and/or ruptured oocysts) | N total = 276<br>24 ± 5 (23) [12-44]                                      | N total = 243<br>20.7 ± 4 (18.5) [9-37]      |
|                                                                                                                                                      |            |                                                                                 | <b>Proportion of ruptured oocysts:</b> the number of ruptured oocysts out of the total number of oocysts (intact + ruptured)                                                                                                     |                                                                           |                                              |
|                                                                                                                                                      |            |                                                                                 | <b>Proportion of oocyst-infected mosquitoes with sporozoites in their head and thorax:</b> the number of oocyst-infected mosquitoes harboring sporozoites in their head/thoraces out of the total number of infected mosquitoes  |                                                                           |                                              |
| <b>Experiment 3:</b><br>Effects of irradiation on <i>An. arabiensis</i> survival                                                                     | 1-7 dpbm   | A (64), C (160), D (88), G (48)                                                 | From 1 to 7 dpbm, the number and time of death was recorded among mosquitoes exposed to the infectious blood-meal                                                                                                                | N total = 165<br>41.25 ± 11 (35.5) [22-72]                                | N total = 168<br>42 ± 8.7 (41.5) [24-61]     |
|                                                                                                                                                      | 1-14 dpbm  | E (32), H (56), I (48), J (32), K (72), L (168), M (32), N (136), O (96), P(96) | From 1 to 14 dpbm, the number and time of death was recorded among mosquitoes exposed to the infectious blood-meal                                                                                                               | N total = 880<br>88 ± 9.9 (85.5) [31-146]                                 | N total = 803<br>80.3 ± 11.9 (62.5) [41-137] |
|                                                                                                                                                      | 1-35 dpbm  | J (32)                                                                          | From 1 dpbm until all mosquitoes had died (35 dpbm), the number and time of death was recorded among both infected mosquitoes and uninfected control mosquitoes                                                                  | infected = 26<br>uninfected = 49                                          | infected = 14<br>uninfected = 45             |

681

682

683 **Figure legend**

684

685 **Figure 1: Effect of irradiation on the competence of *Anopheles arabiensis* for natural**  
686 **isolates of *P. falciparum*.** (A) Oocyst prevalence ( $\pm$  95 % CI) on day 7 post-bloodmeal (dpbm),  
687 expressed as the number of mosquito females harboring at least one oocyst in their midguts out  
688 of the total number of dissected females, for each treatment (white bars: unirradiated-control  
689 mosquitoes, grey bars: irradiated mosquitoes) and for 8 parasite isolates. (B) Infection intensity  
690 ( $\pm$  se) at 7 dpbm, expressed as the mean number of developing oocysts in the guts of infected  
691 females, for each treatment and 8 parasite isolates. (C) Sporozoite prevalence ( $\pm$  95 % CI) at 14  
692 dpbm, expressed as the number of mosquito head/thoraces detected positive to *Plasmodium*  
693 *falciparum* using qPCR out of the total number of dissected head/thoraces, for each treatment  
694 and for 10 parasite isolates. (D) Sporozoite intensity at 14 dpbm, expressed as the mean number  
695 ( $\pm$  se) of amplification cycle during qPCR (the lower the Ct, the higher the sporozoite intensity)  
696 for each treatment and for 10 parasite isolates. \* denotes statistically significant difference (P  
697 value:  $0.01 < * < 0.05$ ); NS: not significant.

698

699 **Figure 2: Effect of irradiation on *P. falciparum* oocyst rupture in mosquito guts and**  
700 **sporozoite dissemination in head/thoraces on day 14 post-bloodmeal (dpbm).** (A)  
701 Proportion of infected mosquitoes with ruptured oocysts ( $\pm$  95 % CI), expressed as the number  
702 of mosquitoes with at least one ruptured oocyst out of the total number of infected mosquitoes  
703 (i.e. harboring either intact and/or ruptured oocysts) at 14 dpbm for each treatment (white bars:  
704 unirradiated-control mosquitoes, grey bars: irradiated mosquitoes) and for 6 parasite isolates.  
705 (B) Proportion of ruptured oocysts ( $\pm$  95% CI), expressed as the number of ruptured oocysts  
706 out of the total number of oocysts (intact + ruptured) at 14 dpbm for each treatment and 6  
707 parasite isolates. (C) Proportion of oocyst-infected mosquitoes with sporozoites in their head

708 and thorax ( $\pm$  95% CI), expressed as the number of oocyst-infected mosquitoes harboring  
709 sporozoites in their head/thoraces out of the total number of infected mosquitoes at 14 dpbm,  
710 for each treatment and for 6 parasite isolates. \* denotes statistically significant difference (P  
711 value:  $0.01 < * < 0.05$ ;  $0 < *** < 0.001$ ); NS: not significant.

712

713

714 **Figure 3: Effect of irradiation on the survival of *Anopheles arabiensis*.** (A) Survivorship of  
715 malaria-exposed mosquitoes from 1 to 7 dpbm for each treatment (grey line: unirradiated-  
716 control, black line: irradiated) using 4 parasite isolates. (B) Survivorship of malaria-infected  
717 mosquitoes from 1 to 14 dpbm for each treatment using 10 parasite isolates. (C). Survivorship  
718 of both malaria-infected (solid lines) and uninfected unirradiated (dashed lines) mosquitoes from  
719 1 to 35 dpbm for each treatment (grey: unirradiated-control, black: irradiated) using 1 parasite  
720 isolate.

721

722

723

724

725

726

727

728

729

730

731

732

733 FIGURE 1

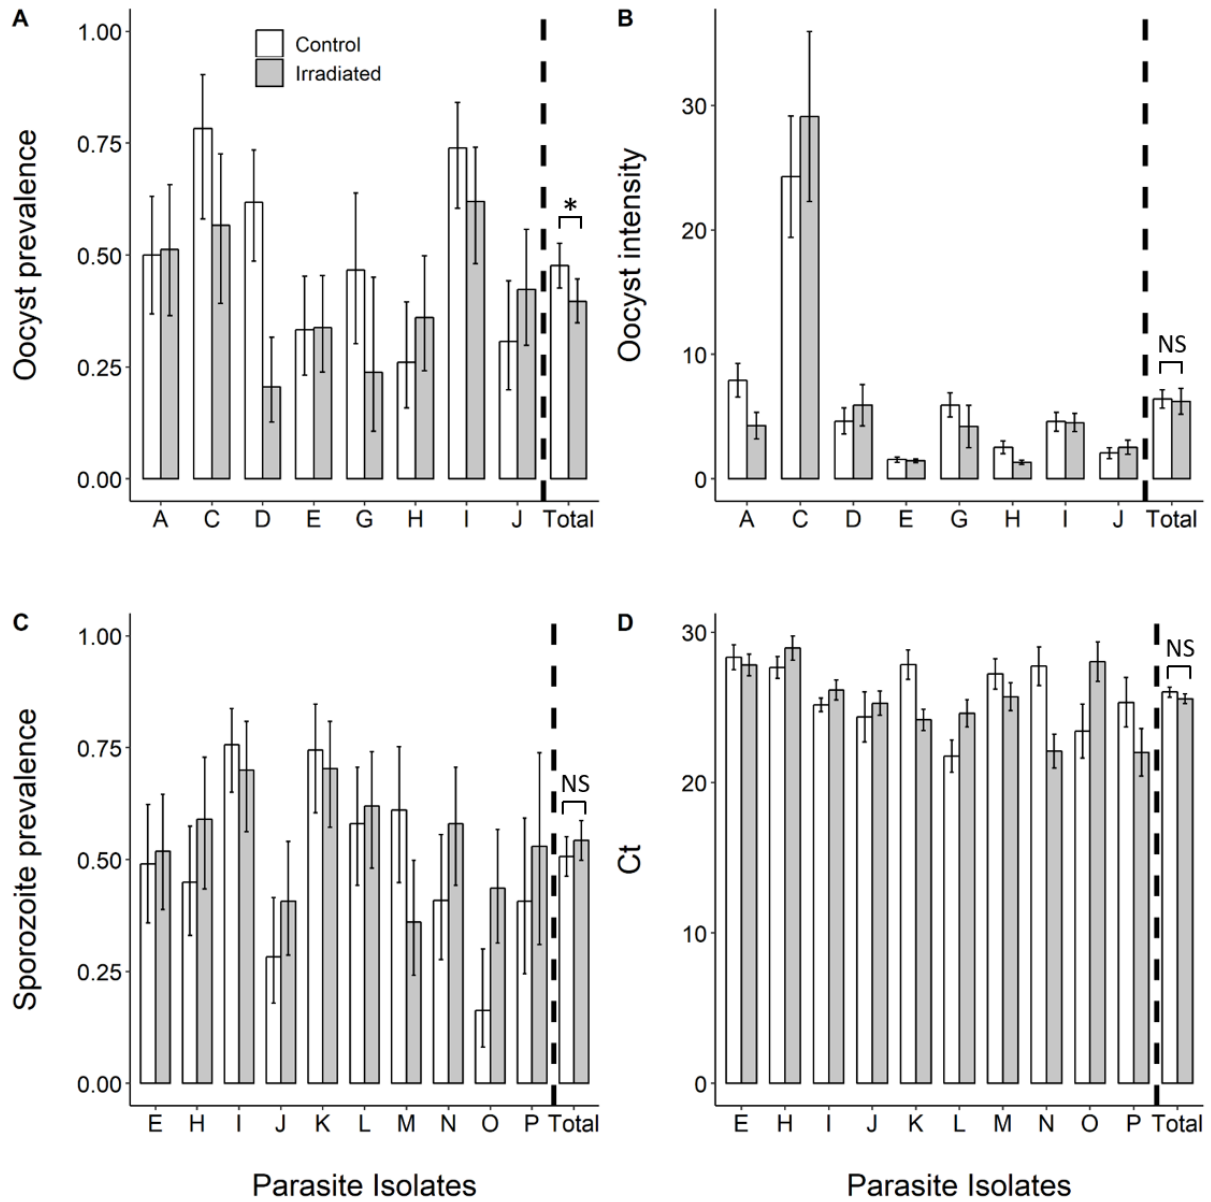

734

735

736

737

738

739

740

741

742 FIGURE 2

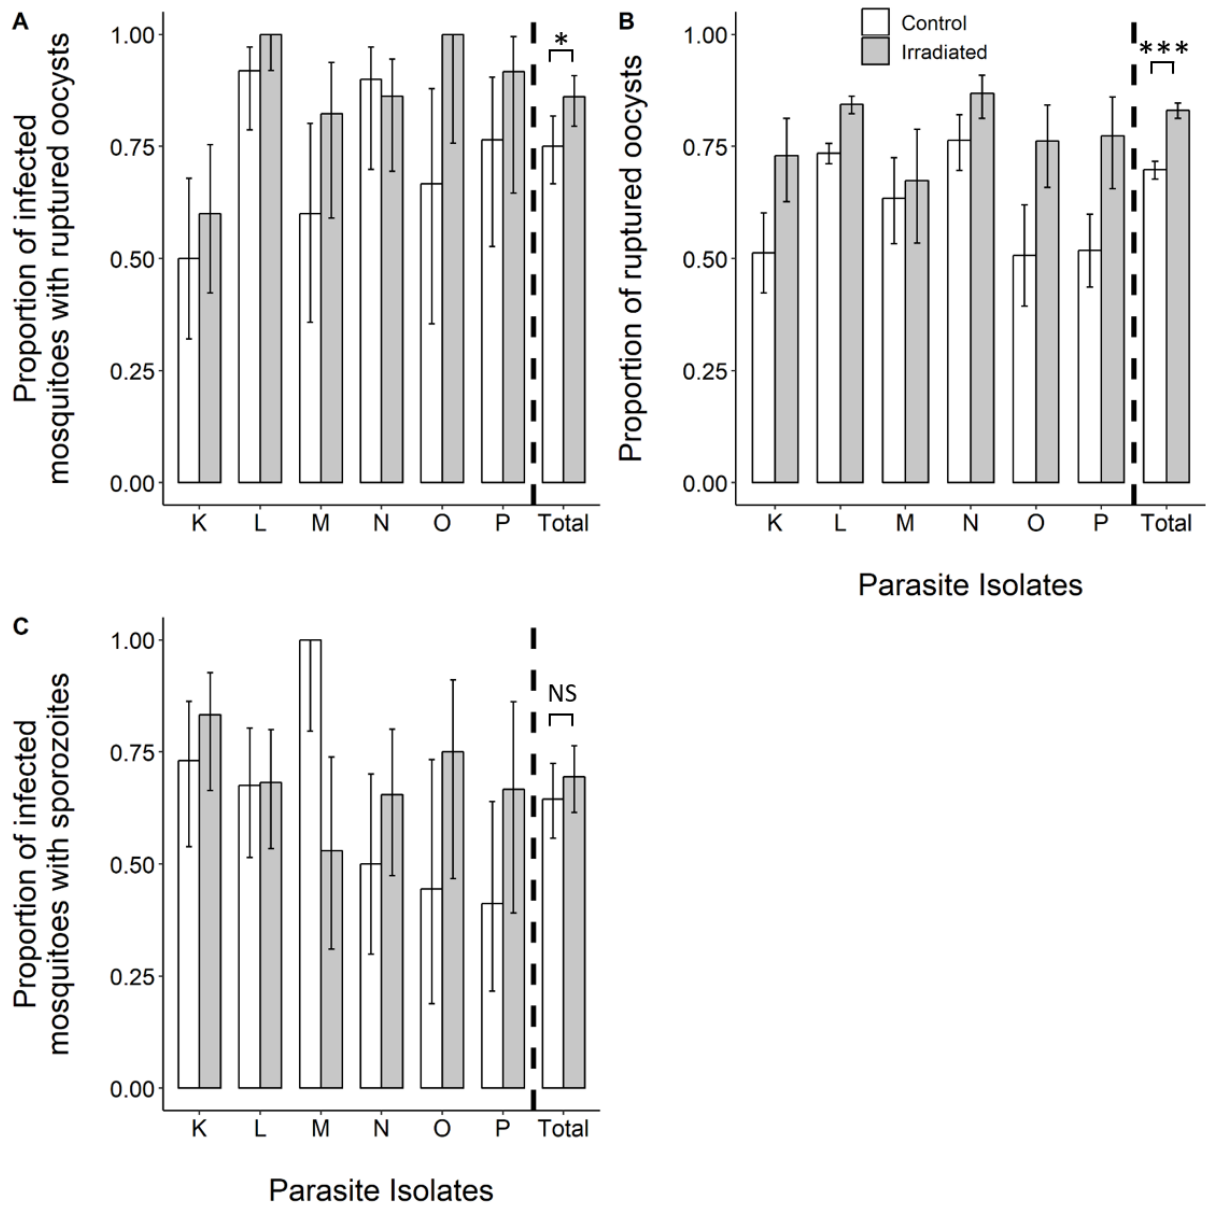

743

744

745

746

747

748

749

750

751 FIGURE 3

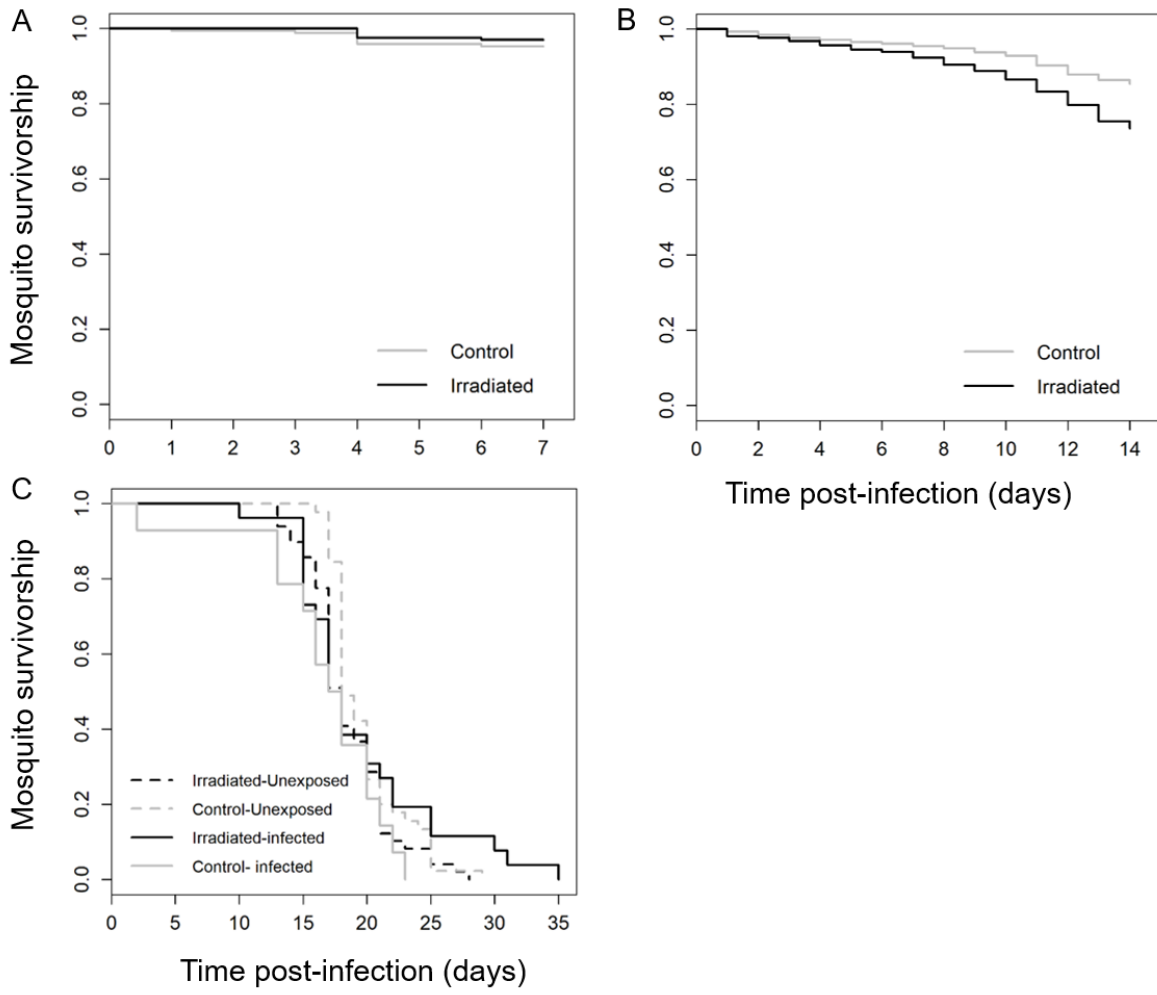

752

753

754

755

756

757

758

759
